# Supplementary material for: Specialized Pediatric Palliative Care Services in Pediatric Hematopoietic Stem Cell Transplant Centers
Source: MDPI journal article supplement (doi:10.3390/children8080615), 2021-07-21
Supplement: s1 [file s1]

**Table S1 Health Care Professionals Responses on the survey**

| Questions                                                                                                                                                                                                                                                                                                                      | Responses                                   | All respondents (n = 98) | Physician (n = 42) | Nurse (n = 40) | Affiliated (n = 16) |
|--------------------------------------------------------------------------------------------------------------------------------------------------------------------------------------------------------------------------------------------------------------------------------------------------------------------------------|---------------------------------------------|--------------------------|--------------------|----------------|---------------------|
| What is your country?                                                                                                                                                                                                                                                                                                          | Belarus                                     | 1 (1)                    | 1 (2.4)            | 0 (0)          | 0 (0)               |
|                                                                                                                                                                                                                                                                                                                                | Belgium                                     | 7 (7.1)                  | 2 (4.8)            | 3 (7.5)        | 2 (12.5)            |
|                                                                                                                                                                                                                                                                                                                                | Brazil                                      | 1 (1)                    | 1 (2.4)            | 0 (0)          | 0 (0)               |
|                                                                                                                                                                                                                                                                                                                                | Czech Republic                              | 1 (1)                    | 1 (2.4)            | 0 (0)          | 0 (0)               |
|                                                                                                                                                                                                                                                                                                                                | Denmark                                     | 4 (4.1)                  | 1 (2.4)            | 2 (5)          | 1 (6.2)             |
|                                                                                                                                                                                                                                                                                                                                | France                                      | 8 (8.2)                  | 3 (7.1)            | 4 (10)         | 1 (6.2)             |
|                                                                                                                                                                                                                                                                                                                                | Germany                                     | 8 (8.2)                  | 4 (9.5)            | 4 (10)         | 0 (0)               |
|                                                                                                                                                                                                                                                                                                                                | Hungary                                     | 3 (3.1)                  | 1 (2.4)            | 1 (2.5)        | 1 (6.2)             |
|                                                                                                                                                                                                                                                                                                                                | Ireland                                     | 1 (1)                    | 1 (2.4)            | 0 (0)          | 0 (0)               |
|                                                                                                                                                                                                                                                                                                                                | Israel                                      | 5 (5.1)                  | 1 (2.4)            | 3 (7.5)        | 1 (6.2)             |
|                                                                                                                                                                                                                                                                                                                                | Italy                                       | 5 (5.1)                  | 2 (4.8)            | 3 (7.5)        | 0 (0)               |
|                                                                                                                                                                                                                                                                                                                                | Lithuania                                   | 2 (2)                    | 1 (2.4)            | 1 (2.5)        | 0 (0)               |
|                                                                                                                                                                                                                                                                                                                                | Netherlands                                 | 4 (4.1)                  | 2 (4.8)            | 1 (2.5)        | 1 (6.2)             |
|                                                                                                                                                                                                                                                                                                                                | Norway                                      | 2 (2)                    | 0 (0)              | 1 (2.5)        | 1 (6.2)             |
|                                                                                                                                                                                                                                                                                                                                | Pakistan                                    | 1 (1)                    | 1 (2.4)            | 0 (0)          | 0 (0)               |
|                                                                                                                                                                                                                                                                                                                                | Poland                                      | 3 (3.1)                  | 1 (2.4)            | 1 (2.5)        | 1 (6.2)             |
|                                                                                                                                                                                                                                                                                                                                | Russia                                      | 3 (3.1)                  | 1 (2.4)            | 1 (2.5)        | 1 (6.2)             |
|                                                                                                                                                                                                                                                                                                                                | Saudi Arabia                                | 1 (1)                    | 1 (2.4)            | 0 (0)          | 0 (0)               |
|                                                                                                                                                                                                                                                                                                                                | Spain                                       | 18 (18.4)                | 8 (19)             | 7 (17.5)       | 3 (18.8)            |
|                                                                                                                                                                                                                                                                                                                                | Sweden                                      | 6 (6.1)                  | 2 (4.8)            | 3 (7.5)        | 1 (6.2)             |
|                                                                                                                                                                                                                                                                                                                                | Switzerland                                 | 2 (2)                    | 1 (2.4)            | 1 (2.5)        | 0 (0)               |
|                                                                                                                                                                                                                                                                                                                                | Turkey                                      | 1 (1)                    | 0 (0)              | 0 (0)          | 1 (6.2)             |
|                                                                                                                                                                                                                                                                                                                                | UK                                          | 11 (11.2)                | 6 (14.3)           | 4 (10)         | 1 (6.2)             |
| Pediatric palliative services according to WHO should provide symptom, emotional, social and spiritual support from the time of diagnosis of a life threatening or life shortening illness.Do you agree that HSCT patients in light of the risk of Transplant Related Mortality (TRM) and relapse should have access to SPPCS? | No                                          | 8 (8.2)                  | 3 (7.1)            | 3 (7.5)        | 2 (12.5)            |
|                                                                                                                                                                                                                                                                                                                                | Yes                                         | 90 (91.8)                | 39 (92.9)          | 37 (92.5)      | 14 (87.5)           |
| What time point do you consider initial referral to SPPCS appropriate?                                                                                                                                                                                                                                                         | At the onset of terminal care               | 23 (23.5)                | 12 (28.6)          | 7 (17.5)       | 4 (25)              |
|                                                                                                                                                                                                                                                                                                                                | At the onset of a life threatening event(s) | 13 (13.3)                | 7 (16.7)           | 3 (7.5)        | 3 (18.8)            |
|                                                                                                                                                                                                                                                                                                                                | At the time of admission to HSCT unit       | 13 (13.3)                | 3 (7.1)            | 8 (20)         | 2 (12.5)            |
|                                                                                                                                                                                                                                                                                                                                | At the time of admission to ICU             | 4 (4.1)                  | 0 (0)              | 4 (10)         | 0 (0)               |
|                                                                                                                                                                                                                                                                                                                                | At the time of difficult symptom control    | 21 (21.4)                | 11 (26.2)          | 5 (12.5)       | 5 (31.2)            |
|                                                                                                                                                                                                                                                                                                                                | At the time of original diagnosis           | 20 (20.4)                | 7 (16.7)           | 11 (27.5)      | 2 (12.5)            |

|                                                                                                                          |                                                                   |           |           |           |           |
|--------------------------------------------------------------------------------------------------------------------------|-------------------------------------------------------------------|-----------|-----------|-----------|-----------|
|                                                                                                                          | Not needed (can be provide by the unit without recourse to SPPCS) | 3 (3.1)   | 1 (2.4)   | 2 (5)     | 0 (0)     |
|                                                                                                                          | To provide bereavement counseling                                 | 1 (1)     | 1 (2.4)   | 0 (0)     | 0 (0)     |
| <b>Please rank how important you consider the following services provided by SPPCS by ticking the appropriate answer</b> |                                                                   |           |           |           |           |
| Pain management -                                                                                                        | extremely important (+2)                                          | 80 (81.6) | 32 (76.2) | 33 (82.5) | 15 (93.8) |
|                                                                                                                          | very important (+1)                                               | 16 (16.3) | 9 (21.4)  | 6 (15)    | 1 (6.2)   |
|                                                                                                                          | neutral (0)                                                       | 1 (1)     | 1 (2.4)   | 0 (0)     | 0 (0)     |
|                                                                                                                          | not very important (-1)                                           | 0 (0)     | 0 (0)     | 0 (0)     | 0 (0)     |
|                                                                                                                          | not necessary (-2)                                                | 1 (1)     | 0 (0)     | 1 (2.5)   | 0 (0)     |
| Other symptom control -                                                                                                  | extremely important (+2)                                          | 37 (37.8) | 15 (35.7) | 19 (47.5) | 3 (18.8)  |
|                                                                                                                          | very important (+1)                                               | 51 (52)   | 24 (57.1) | 19 (47.5) | 8 (50)    |
|                                                                                                                          | neutral (0)                                                       | 9 (9.2)   | 3 (7.1)   | 1 (2.5)   | 5 (31.2)  |
|                                                                                                                          | not very important (-1)                                           | 0 (0)     | 0 (0)     | 0 (0)     | 0 (0)     |
|                                                                                                                          | not necessary (-2)                                                | 1 (1)     | 0 (0)     | 1 (2.5)   | 0 (0)     |
| Emotional support -                                                                                                      | extremely important (+2)                                          | 50 (51)   | 17 (40.5) | 23 (57.5) | 10 (62.5) |
|                                                                                                                          | very important (+1)                                               | 41 (41.8) | 22 (52.4) | 13 (32.5) | 6 (37.5)  |
|                                                                                                                          | neutral (0)                                                       | 6 (6.1)   | 3 (7.1)   | 3 (7.5)   | 0 (0)     |
|                                                                                                                          | not very important (-1)                                           | 0 (0)     | 0 (0)     | 0 (0)     | 0 (0)     |
|                                                                                                                          | not necessary (-2)                                                | 1 (1)     | 0 (0)     | 1 (2.5)   | 0 (0)     |
| Spiritual support -                                                                                                      | extremely important (+2)                                          | 26 (26.5) | 12 (28.6) | 10 (25)   | 4 (25)    |
|                                                                                                                          | very important (+1)                                               | 42 (42.9) | 13 (31)   | 20 (50)   | 9 (56.2)  |
|                                                                                                                          | neutral (0)                                                       | 27 (27.6) | 16 (38.1) | 8 (20)    | 3 (18.8)  |
|                                                                                                                          | not very important (-1)                                           | 2 (2)     | 1 (2.4)   | 1 (2.5)   | 0 (0)     |
|                                                                                                                          | not necessary (-2)                                                | 1 (1)     | 0 (0)     | 1 (2.5)   | 0 (0)     |
| Ethical guidance -                                                                                                       | extremely important (+2)                                          | 35 (35.7) | 14 (33.3) | 15 (37.5) | 6 (37.5)  |
|                                                                                                                          | very important (+1)                                               | 36 (36.7) | 13 (31)   | 16 (40)   | 7 (43.8)  |
|                                                                                                                          | neutral (0)                                                       | 22 (22.4) | 13 (31)   | 7 (17.5)  | 2 (12.5)  |
|                                                                                                                          | not very important (-1)                                           | 3 (3.1)   | 2 (4.8)   | 0 (0)     | 1 (6.2)   |
|                                                                                                                          | not necessary (-2)                                                | 2 (2)     | 0 (0)     | 2 (5)     | 0 (0)     |
|                                                                                                                          |                                                                   |           |           |           |           |
| Ensuring quality of life -                                                                                               | extremely important (+2)                                          | 71 (72.4) | 28 (66.7) | 30 (75)   | 13 (81.2) |
|                                                                                                                          | very important (+1)                                               | 24 (24.5) | 12 (28.6) | 9 (22.5)  | 3 (18.8)  |
|                                                                                                                          | neutral (0)                                                       | 2 (2)     | 2 (4.8)   | 0 (0)     | 0 (0)     |
|                                                                                                                          | not very important (-1)                                           | 0 (0)     | 0 (0)     | 0 (0)     | 0 (0)     |
|                                                                                                                          | not necessary (-2)                                                | 1 (1)     | 0 (0)     | 1 (2.5)   | 0 (0)     |
| Facilitating shared decision making with the child -                                                                     | extremely important (+2)                                          | 52 (53.1) | 18 (42.9) | 24 (60)   | 10 (62.5) |
|                                                                                                                          | very important (+1)                                               | 35 (35.7) | 17 (40.5) | 14 (35)   | 4 (25)    |
|                                                                                                                          | neutral (0)                                                       | 10 (10.2) | 7 (16.7)  | 1 (2.5)   | 2 (12.5)  |
|                                                                                                                          | not very important (-1)                                           | 1 (1)     | 0 (0)     | 1 (2.5)   | 0 (0)     |
|                                                                                                                          | not necessary (-2)                                                | 0 (0)     | 0 (0)     | 0 (0)     | 0 (0)     |
| Facilitating shared decision making with parent(s) -                                                                     | extremely important (+2)                                          | 63 (64.3) | 26 (61.9) | 25 (62.5) | 12 (75)   |
|                                                                                                                          | very important (+1)                                               | 30 (30.6) | 14 (33.3) | 13 (32.5) | 3 (18.8)  |
|                                                                                                                          | neutral (0)                                                       | 4 (4.1)   | 2 (4.8)   | 1 (2.5)   | 1 (6.2)   |
|                                                                                                                          | not very important (-1)                                           | 1 (1)     | 0 (0)     | 1 (2.5)   | 0 (0)     |

|                                                                                                          |                          |            |                |                |                |
|----------------------------------------------------------------------------------------------------------|--------------------------|------------|----------------|----------------|----------------|
|                                                                                                          | not necessary (-2)       | 0 (0)      | 0 (0)          | 0 (0)          | 0 (0)          |
| Facilitating communication with parents about end of life issues -                                       | extremely important (+2) | 70 (71.4)  | 25 (59.5)      | 30 (75)        | 15 (93.8)      |
|                                                                                                          | very important (+1)      | 21 (21.4)  | 13 (31)        | 7 (17.5)       | 1 (6.2)        |
|                                                                                                          | neutral (0)              | 6 (6.1)    | 4 (9.5)        | 2 (5)          | 0 (0)          |
|                                                                                                          | not very important (-1)  | 1 (1)      | 0 (0)          | 1 (2.5)        | 0 (0)          |
|                                                                                                          | not necessary (-2)       | 0 (0)      | 0 (0)          | 0 (0)          | 0 (0)          |
| Facilitating communication with the child about end of life issues -                                     | extremely important (+2) | 53 (54.1)  | 16 (38.1)      | 25 (62.5)      | 12 (75)        |
|                                                                                                          | very important (+1)      | 32 (32.7)  | 18 (42.9)      | 11 (27.5)      | 3 (18.8)       |
|                                                                                                          | neutral (0)              | 11 (11.2)  | 7 (16.7)       | 3 (7.5)        | 1 (6.2)        |
|                                                                                                          | not very important (-1)  | 2 (2)      | 1 (2.4)        | 1 (2.5)        | 0 (0)          |
|                                                                                                          | not necessary (-2)       | 0 (0)      | 0 (0)          | 0 (0)          | 0 (0)          |
| Supporting the HSCT team in difficult decision making process around end life issues -                   | extremely important (+2) | 49 (50)    | 18 (42.9)      | 22 (55)        | 9 (56.2)       |
|                                                                                                          | very important (+1)      | 37 (37.8)  | 18 (42.9)      | 14 (35)        | 5 (31.2)       |
|                                                                                                          | neutral (0)              | 9 (9.2)    | 5 (11.9)       | 3 (7.5)        | 1 (6.2)        |
|                                                                                                          | not very important (-1)  | 1 (1)      | 0 (0)          | 1 (2.5)        | 0 (0)          |
|                                                                                                          | not necessary (-2)       | 2 (2)      | 1 (2.4)        | 0 (0)          | 1 (6.2)        |
| Bereavement counseling -                                                                                 | extremely important (+2) | 38 (38.8)  | 13 (31)        | 17 (42.5)      | 8 (50)         |
|                                                                                                          | very important (+1)      | 46 (46.9)  | 21 (50)        | 17 (42.5)      | 8 (50)         |
|                                                                                                          | neutral (0)              | 11 (11.2)  | 7 (16.7)       | 4 (10)         | 0 (0)          |
|                                                                                                          | not very important (-1)  | 2 (2)      | 0 (0)          | 2 (5)          | 0 (0)          |
|                                                                                                          | not necessary (-2)       | 1 (1)      | 1 (2.4)        | 0 (0)          | 0 (0)          |
| Facilitating interdisciplinary care -                                                                    | extremely important (+2) | 47 (48)    | 18 (42.9)      | 21 (52.5)      | 8 (50)         |
|                                                                                                          | very important (+1)      | 37 (37.8)  | 16 (38.1)      | 14 (35)        | 7 (43.8)       |
|                                                                                                          | neutral (0)              | 10 (10.2)  | 7 (16.7)       | 3 (7.5)        | 0 (0)          |
|                                                                                                          | not very important (-1)  | 4 (4.1)    | 1 (2.4)        | 2 (5)          | 1 (6.2)        |
|                                                                                                          | not necessary (-2)       | 0 (0)      | 0 (0)          | 0 (0)          | 0 (0)          |
| Advance care plan provision -                                                                            | extremely important (+2) | 36 (36.7)  | 11 (26.2)      | 18 (45)        | 7 (43.8)       |
|                                                                                                          | very important (+1)      | 43 (43.9)  | 21 (50)        | 16 (40)        | 6 (37.5)       |
|                                                                                                          | neutral (0)              | 15 (15.3)  | 8 (19)         | 5 (12.5)       | 2 (12.5)       |
|                                                                                                          | not very important (-1)  | 2 (2)      | 0 (0)          | 1 (2.5)        | 1 (6.2)        |
|                                                                                                          | not necessary (-2)       | 2 (2)      | 2 (4.8)        | 0 (0)          | 0 (0)          |
| Sum of the scores                                                                                        | median [IQR]             | 20 [15-24] | 17 [13.2-22.8] | 22.5 [15.8-25] | 20.5 [19-23.5] |
|                                                                                                          | (range)                  | (-21-28)   | (3-28)         | (-21-28)       | (10-28)        |
| Do you consider research in pediatric palliative care necessary?                                         | No                       | 3 (3.1)    | 2 (4.8)        | 1 (2.5)        | 0 (0)          |
|                                                                                                          | Yes                      | 95 (96.9)  | 40 (95.2)      | 39 (97.5)      | 16 (100)       |
| Do you consider research in pediatric palliative care important?                                         | No                       | 2 (2)      | 1 (2.4)        | 1 (2.5)        | 0 (0)          |
|                                                                                                          | Yes                      | 96 (98)    | 41 (97.6)      | 39 (97.5)      | 16 (100)       |
| Do you consider research in pediatric palliative care ethical?                                           | No                       | 1 (1)      | 1 (2.4)        | 0 (0)          | 0 (0)          |
|                                                                                                          | Yes                      | 97 (99)    | 41 (97.6)      | 40 (100)       | 16 (100)       |
| Answers are described as number (percentage- by column, conditionally to the profession) or median [IQR] |                          |            |                |                |                |

**Table S2 Physicians Responses on the survey**

| Questions         | Responses | Physician (n = 42) |
|-------------------|-----------|--------------------|
| JACIE accredited? | No        | 15 (36.6)          |

|                                                                                                             |                                                                                                                                                                                           |                                                                      |
|-------------------------------------------------------------------------------------------------------------|-------------------------------------------------------------------------------------------------------------------------------------------------------------------------------------------|----------------------------------------------------------------------|
|                                                                                                             | Yes<br>missing                                                                                                                                                                            | 26 (63.4)<br>1                                                       |
| Does your HSCT unit have access to specialist pediatric palliative care services (SPPCS)?                   | No<br>Yes<br>missing                                                                                                                                                                      | 7 (17.1)<br>34 (82.9)<br>1                                           |
| Does your HSCT unit routinely refer HSCT children to specialist pediatric palliative care services (SPPCS)? | No (including the No at Q4)<br>Yes<br>missing                                                                                                                                             | 23 (56.1)<br>18 (43.9)<br>1                                          |
| <b>If Yes: Please indicate the type and number of staff involved in SPPCS team</b>                          |                                                                                                                                                                                           |                                                                      |
| Physician dedicated in palliative care                                                                      | No<br>Yes<br>missing                                                                                                                                                                      | 1 (6.2)<br>15 (93.8)<br>2 on 18                                      |
| Nurse dedicated to palliative care                                                                          | No<br>Yes<br>missing                                                                                                                                                                      | 2 (13.3)<br>13 (86.7)<br>3 on 18                                     |
| Social worker                                                                                               | No<br>Yes<br>missing                                                                                                                                                                      | 3 (18.8)<br>13 (81.2)<br>2 on 18                                     |
| Play therapist                                                                                              | No<br>Yes<br>missing                                                                                                                                                                      | 2 (13.3)<br>13 (86.7)<br>3 on 18                                     |
| Educationalist                                                                                              | No<br>Yes<br>missing                                                                                                                                                                      | 5 (35.7)<br>9 (64.3)<br>4 on 18                                      |
| Pastor or other spiritual specialist                                                                        | No<br>Yes<br>missing                                                                                                                                                                      | 6 (40)<br>9 (60)<br>3 on 18                                          |
| Ethicist                                                                                                    | No<br>Yes<br>missing                                                                                                                                                                      | 10 (76.9)<br>3 (23.1)<br>5 on 18                                     |
| Pain specialist                                                                                             | No<br>Yes<br>missing                                                                                                                                                                      | 1 (6.2)<br>15 (93.8)<br>2 on 18                                      |
| Other (please print)                                                                                        | care coordinator<br>on an as needed basis<br>Play therapist is a psychologist. The pastor is not in the team but he is available when needed<br>psycholog<br>psychologist<br>Psychologist | 1 (16.7)<br>1 (16.7)<br>1 (16.7)<br>1 (16.7)<br>1 (16.7)<br>1 (16.7) |
| <b>If no: Who provides pediatric palliative care?</b>                                                       |                                                                                                                                                                                           |                                                                      |
| Individual transplant physician in charge                                                                   | No<br>Yes<br>missing                                                                                                                                                                      | 1 (5.3)<br>18 (94.7)<br>4 on 23                                      |
| Adult palliative services                                                                                   | No<br>Yes                                                                                                                                                                                 | 14 (77.8)<br>4 (22.2)                                                |

|                                                                                                                                                  |                                                                  |           |
|--------------------------------------------------------------------------------------------------------------------------------------------------|------------------------------------------------------------------|-----------|
|                                                                                                                                                  | missing                                                          | 5 on 23   |
| Nurse led team                                                                                                                                   | No                                                               | 11 (61.1) |
|                                                                                                                                                  | Yes                                                              | 7 (38.9)  |
|                                                                                                                                                  | missing                                                          | 5 on 23   |
| Other (please state)                                                                                                                             | No                                                               | 8 (50)    |
|                                                                                                                                                  | Yes                                                              | 8 (50)    |
|                                                                                                                                                  | missing                                                          | 7 on 23   |
| Detail                                                                                                                                           | Acute pain team and paediatric hospice team                      | 1 (14.3)  |
|                                                                                                                                                  | Care Team                                                        | 1 (14.3)  |
|                                                                                                                                                  | dedicated palliative referent physician and nurse for pediatrics | 1 (14.3)  |
|                                                                                                                                                  | Pain team (anesthetist)                                          | 1 (14.3)  |
|                                                                                                                                                  | pediatric palliative physician                                   | 1 (14.3)  |
|                                                                                                                                                  | Physicians of paediatric palliative service                      | 1 (14.3)  |
|                                                                                                                                                  | Psychologist                                                     | 1 (14.3)  |
|                                                                                                                                                  | missing                                                          | 1 on 8    |
| <b>Does your HSCT unit have access to?</b>                                                                                                       |                                                                  |           |
| Specialized pediatric palliative home care treatment facilities                                                                                  | No                                                               | 4 (20)    |
|                                                                                                                                                  | Yes                                                              | 16 (80)   |
|                                                                                                                                                  | missing                                                          | 22        |
| Pediatric hospice                                                                                                                                | No                                                               | 17 (41.5) |
|                                                                                                                                                  | Yes                                                              | 24 (58.5) |
|                                                                                                                                                  | missing                                                          | 1         |
| Specialized bereavement services                                                                                                                 | No                                                               | 18 (43.9) |
|                                                                                                                                                  | Yes                                                              | 23 (56.1) |
|                                                                                                                                                  | missing                                                          | 1         |
| Out of hours palliative care team                                                                                                                | No                                                               | 11 (28.9) |
|                                                                                                                                                  | Yes                                                              | 27 (71.1) |
|                                                                                                                                                  | missing                                                          | 4         |
| Are Institutional guidelines available for pediatric palliative care?                                                                            | No                                                               | 14 (37.8) |
|                                                                                                                                                  | Yes                                                              | 23 (62.2) |
|                                                                                                                                                  | missing                                                          | 5         |
| Are National guidelines available for pediatric palliative care ?                                                                                | No                                                               | 20 (58.8) |
|                                                                                                                                                  | Yes                                                              | 14 (41.2) |
|                                                                                                                                                  | missing                                                          | 8         |
| Do you routinely use Advanced Care Planning (a process that enables individuals to make plans about their future health care) in your HSCT unit? | No                                                               | 24 (60)   |
|                                                                                                                                                  | Yes                                                              | 16 (40)   |
|                                                                                                                                                  | missing                                                          | 2         |
